# Supplementary material for: New Antifeedant Grayanane Diterpenoids from the Flowers of Pieris formosa
Source: PubMed Central journal article supplement (PMC6151510; doi:10.3390/molecules22091431), 2017-08-31
Supplement: molecules-22-01431-s001.pdf [file molecules-22-01431-s001.pdf]

## Supplementary Data

### New antifeedant grayanane diterpenoids from the flowers of *Pieris*

#### *Formosa*

Chun-Huan Li<sup>1</sup>, Shi-Hong Luo<sup>2</sup>, Sheng-Hong Li,<sup>2,\*</sup> and Jin-Ming Gao<sup>1,\*</sup>

<sup>1</sup> Shanxi Key Laboratory of Natural Products & Chemical Biology, College of Chemistry & Pharmacy, Northwest A&F University, Yangling 712100, People's Republic of China

<sup>2</sup> State Key Laboratory of Phytochemistry and Plant Resources in West China, Kunming Institute of Botany, Chinese Academy of Sciences, Lanhei Road 132, Kunming 650201, People's Republic of China

\* Correspondence: [jinminggao@nwsuaf.edu.cn](mailto:jinminggao@nwsuaf.edu.cn)(J.M.G.); Tel.: +86-29-87092515; [shli@mail.kib.ac.cn](mailto:shli@mail.kib.ac.cn) (S.-H. Li). Tel/Fax: +86 871 65223035.

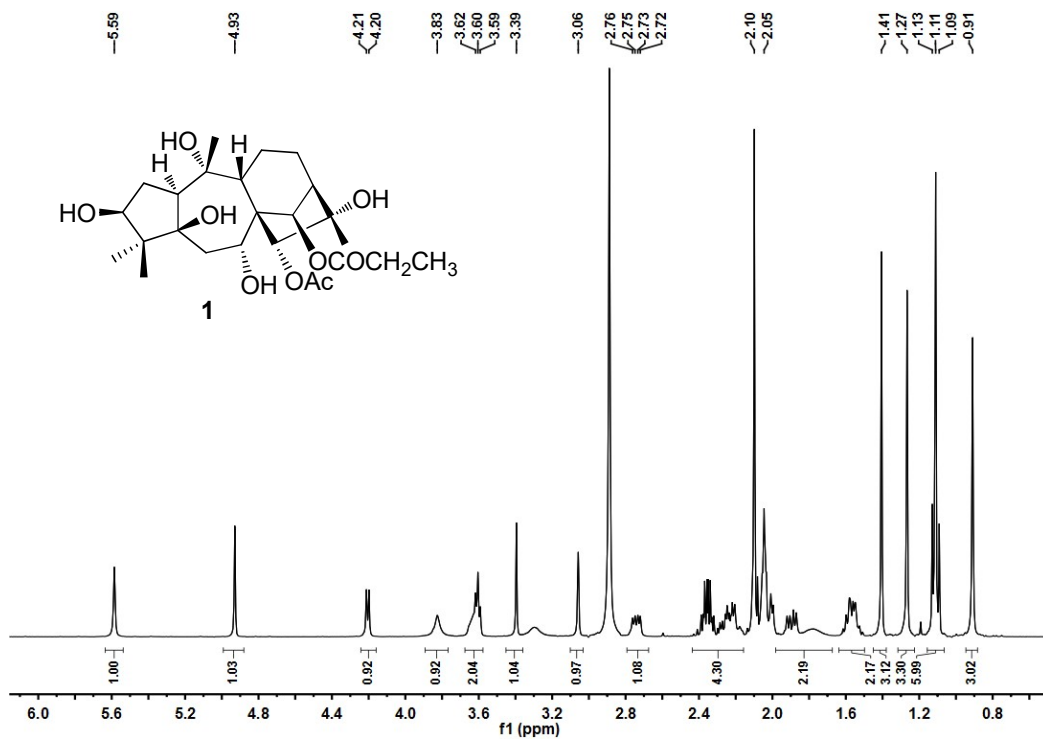

Figure S1.  $^1\text{H}$  spectrum of Pierisoid C (1) in acetone- $d_6$

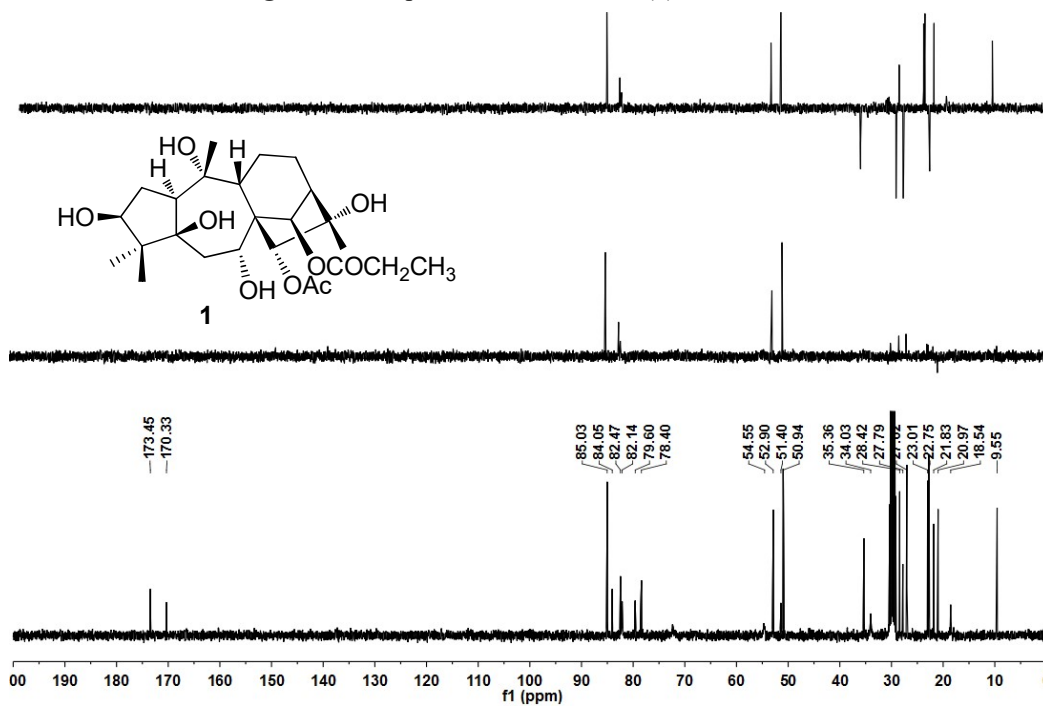

Figure S2.  $^{13}\text{C}$  NMR spectrum of Pierisoid C (1) in acetone- $d_6$

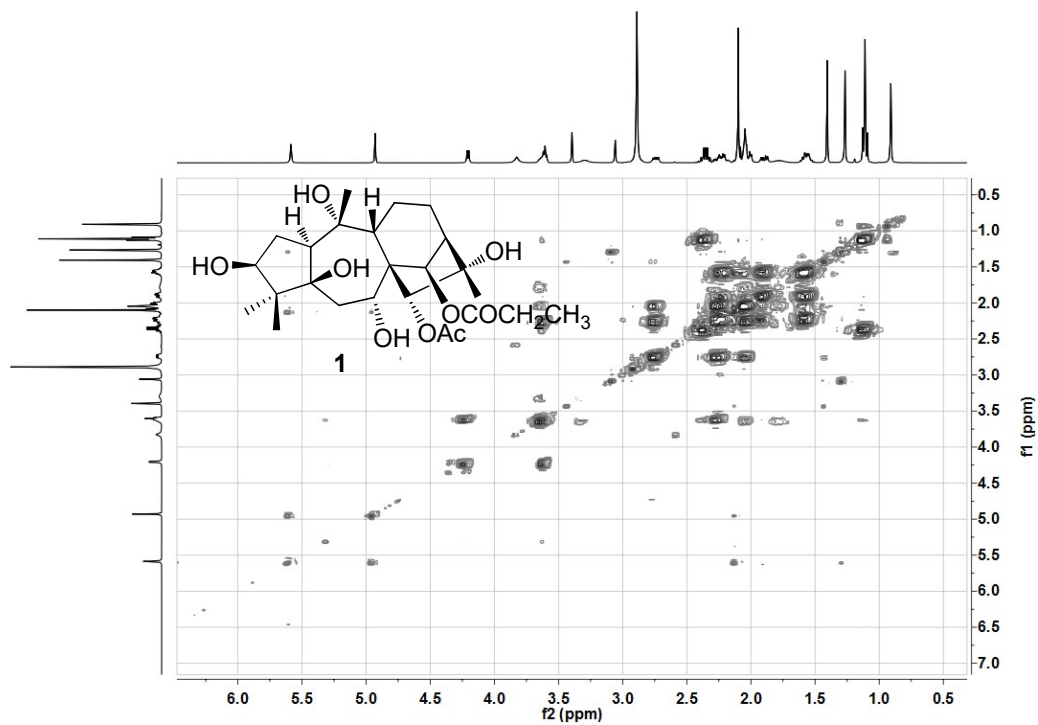

Figure S3.  $^1\text{H}$ - $^1\text{H}$  COSY spectrum of Pierisoid C (1) in acetone- $d_6$

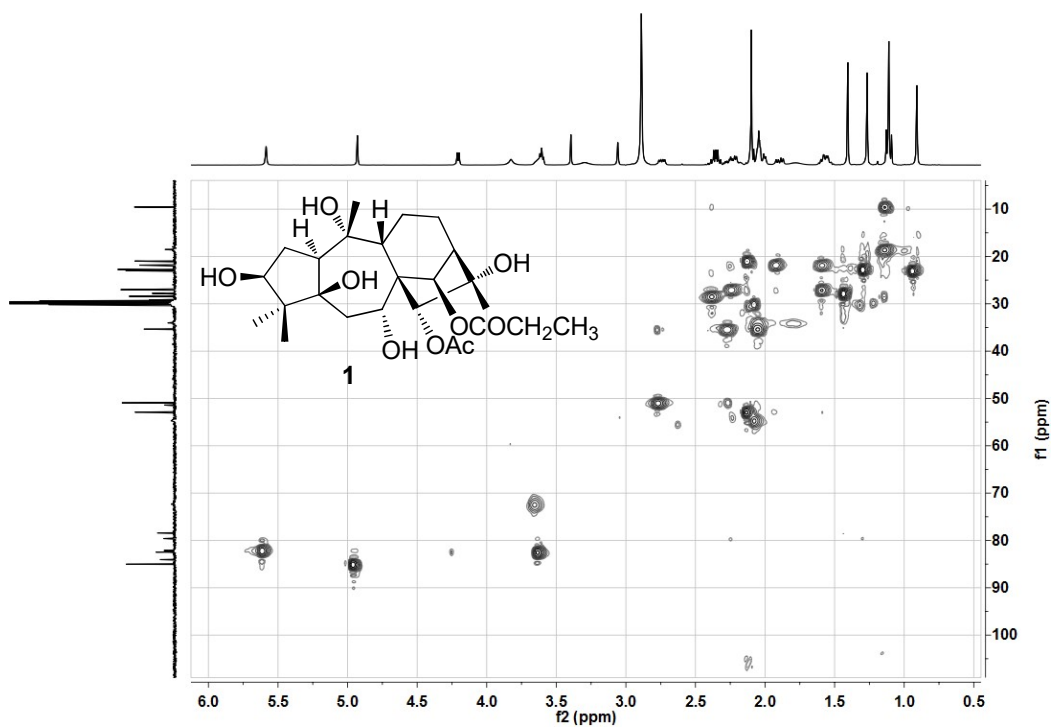

Figure S4. HSQC spectrum of Pierisoid C (1) in acetone- $d_6$

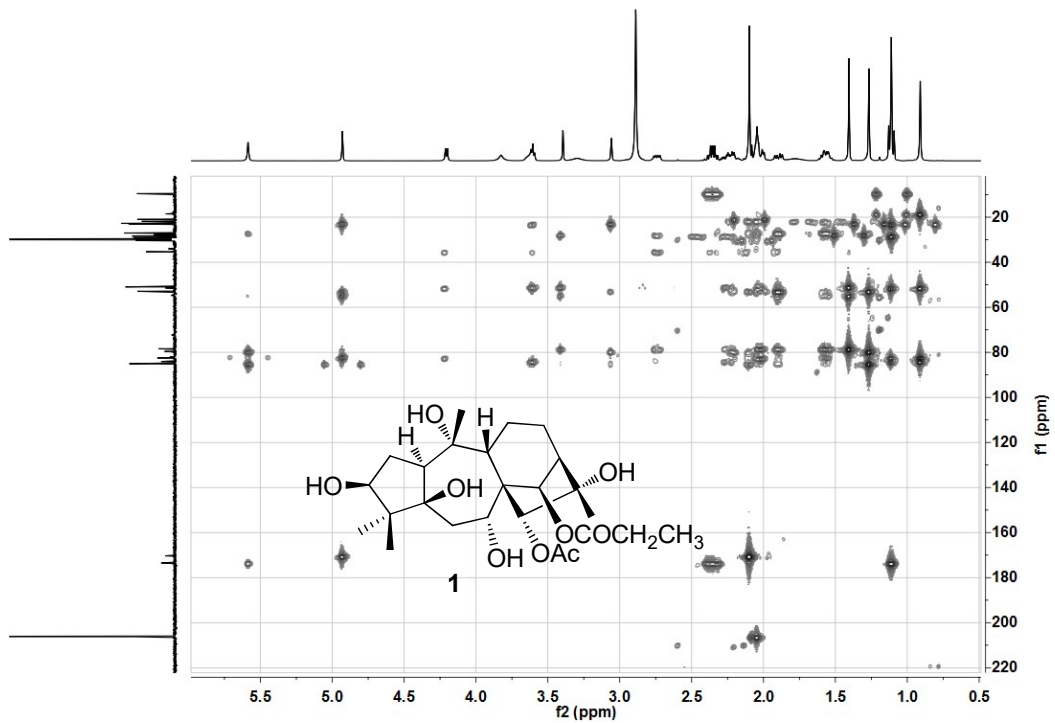

Figure S5. HMBC spectrum of Pierisoid C (1) in acetone- $d_6$

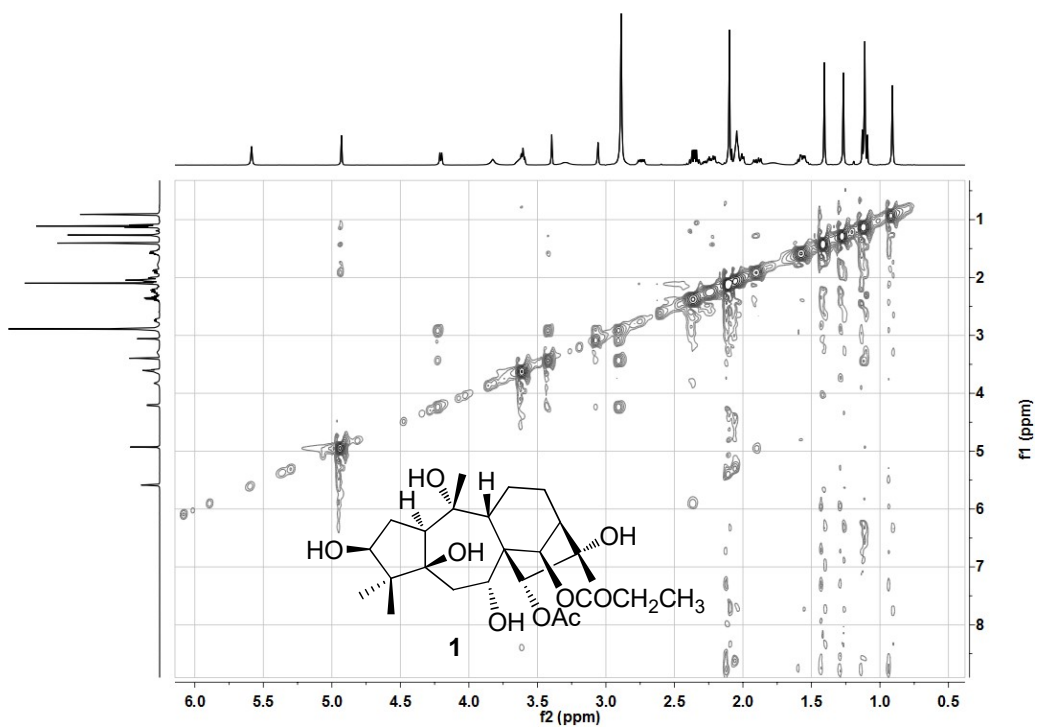

Figure S6. ROESY spectrum of Pierisoid C (1) in acetone- $d_6$

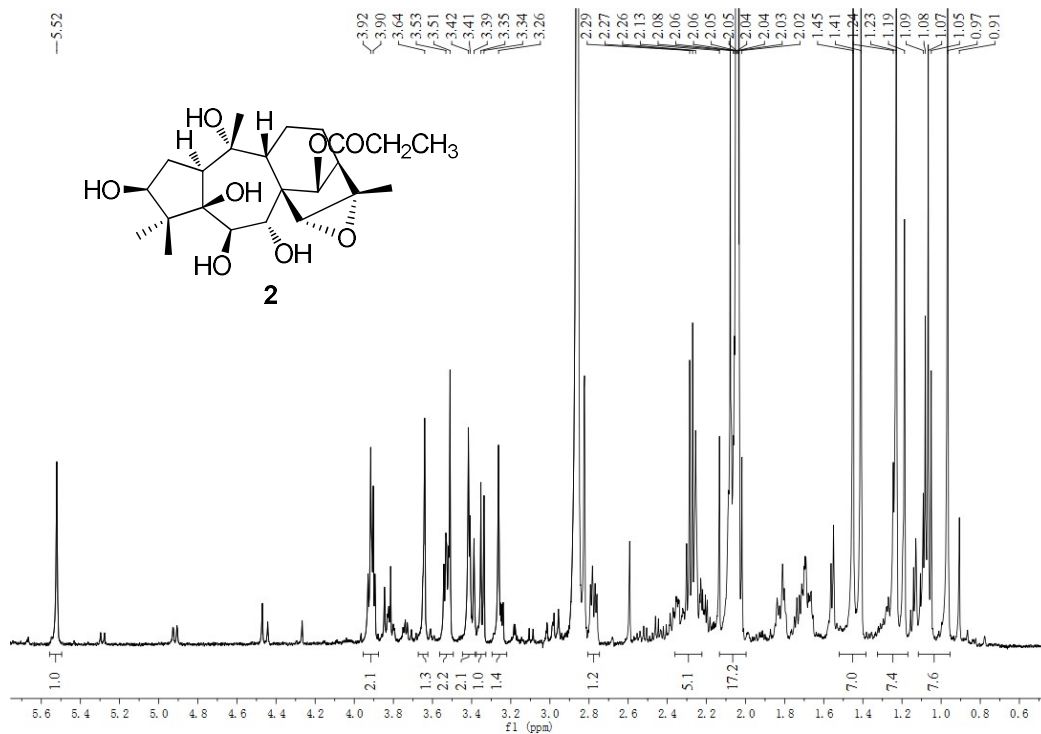

Figure S7.  $^1\text{H}$  NMR spectrum of Pierisoid D (2) in acetone- $d_6$

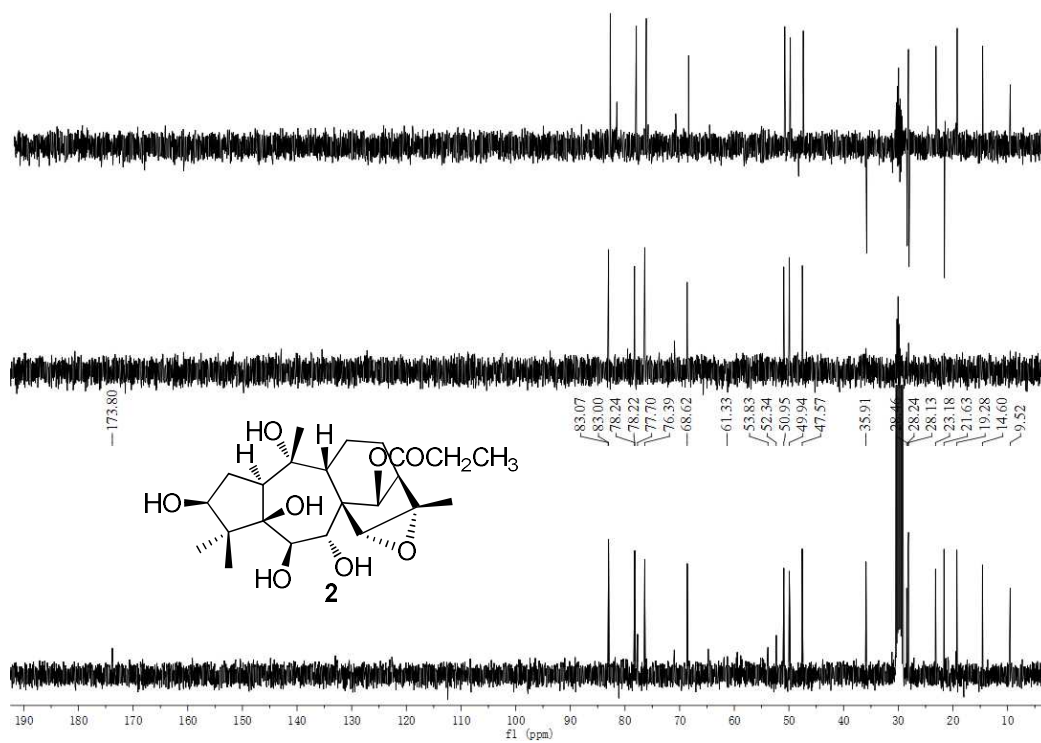

Figure S8.  $^{13}\text{C}$  NMR spectrum of Pierisoid D (2) in acetone- $d_6$

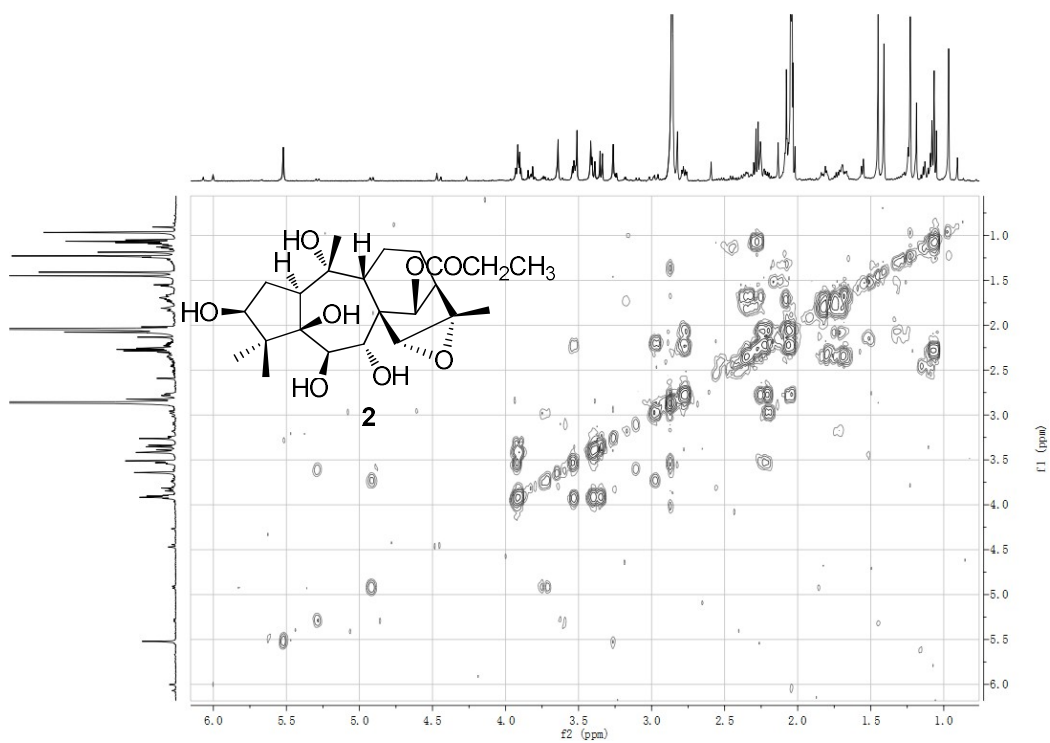

Figure S9.  $^1\text{H}$ - $^1\text{H}$  COSY spectrum of Pierisoid D (**2**) in acetone- $d_6$

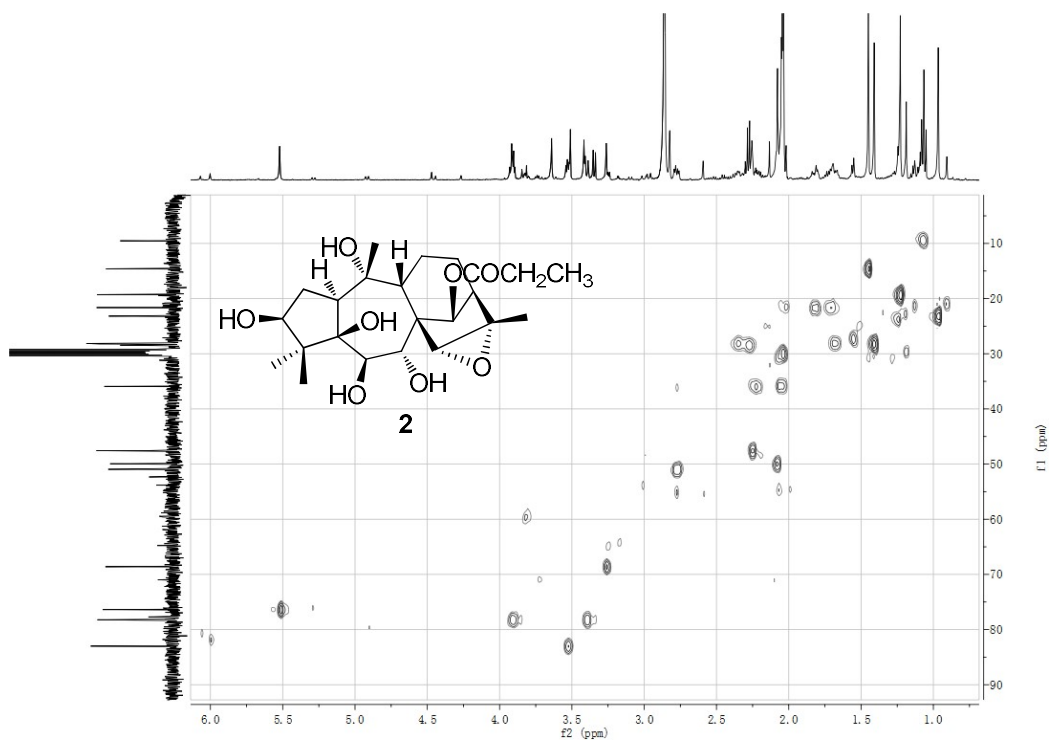

Figure S10. HSQC spectrum of Pierisoid D (**2**) in acetone- $d_6$

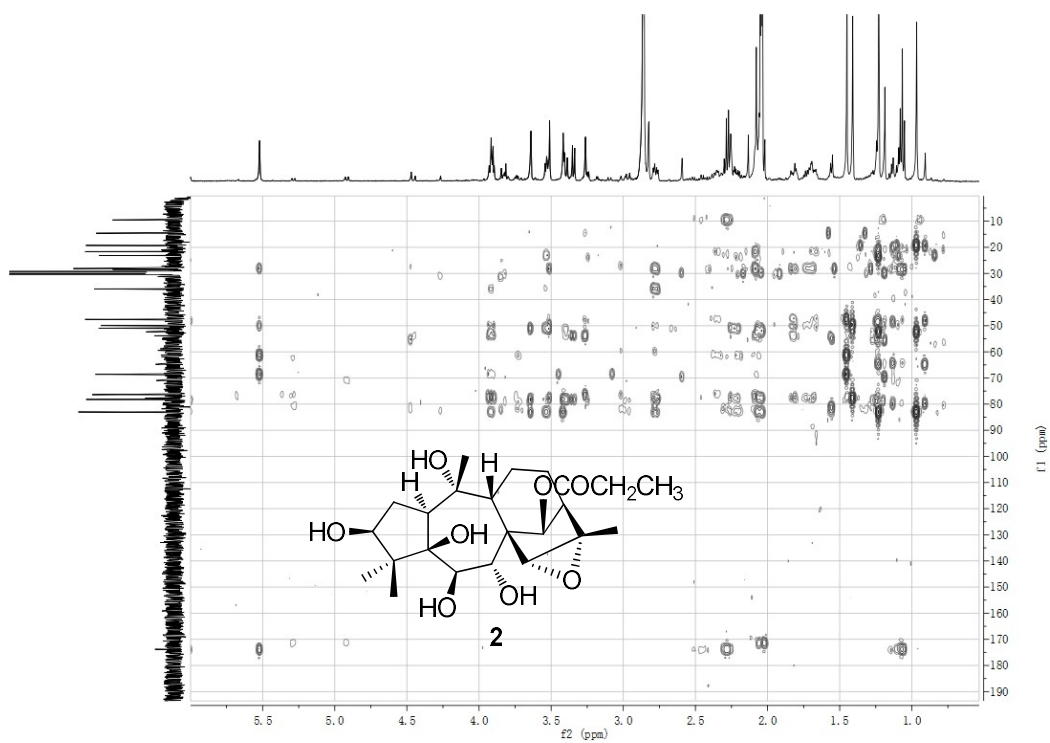

Figure S11. HMBC spectrum of Pierisoid D (2) in acetone- $d_6$

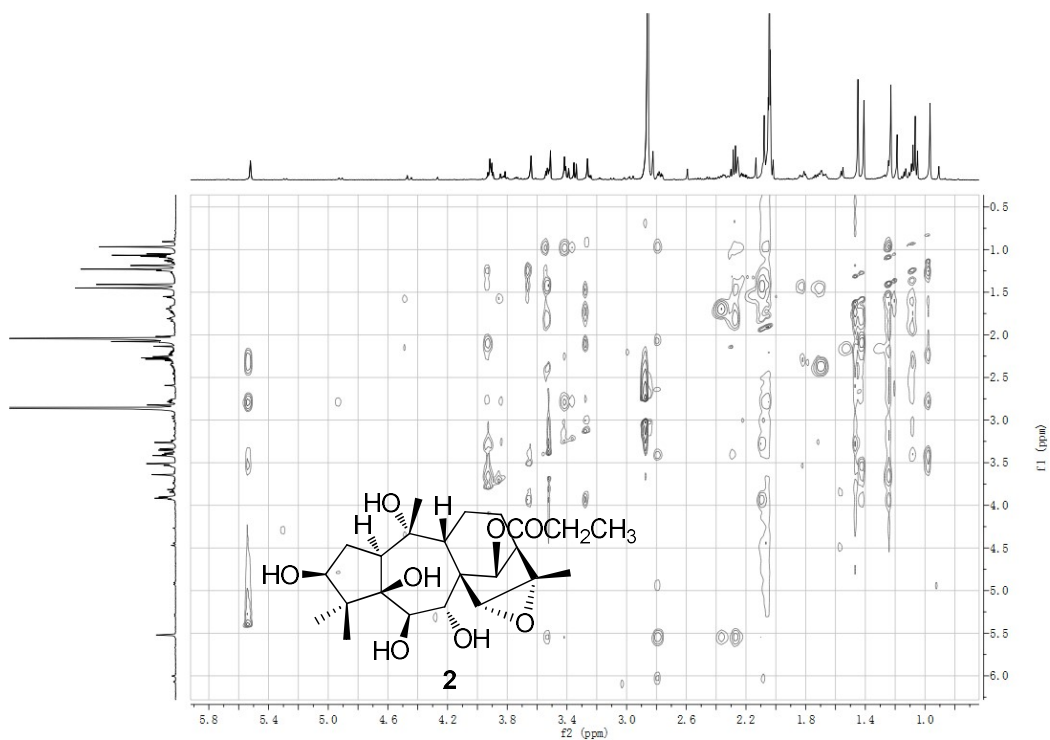

Figure S12. ROESY spectrum of Pierisoid D (2) in acetone- $d_6$

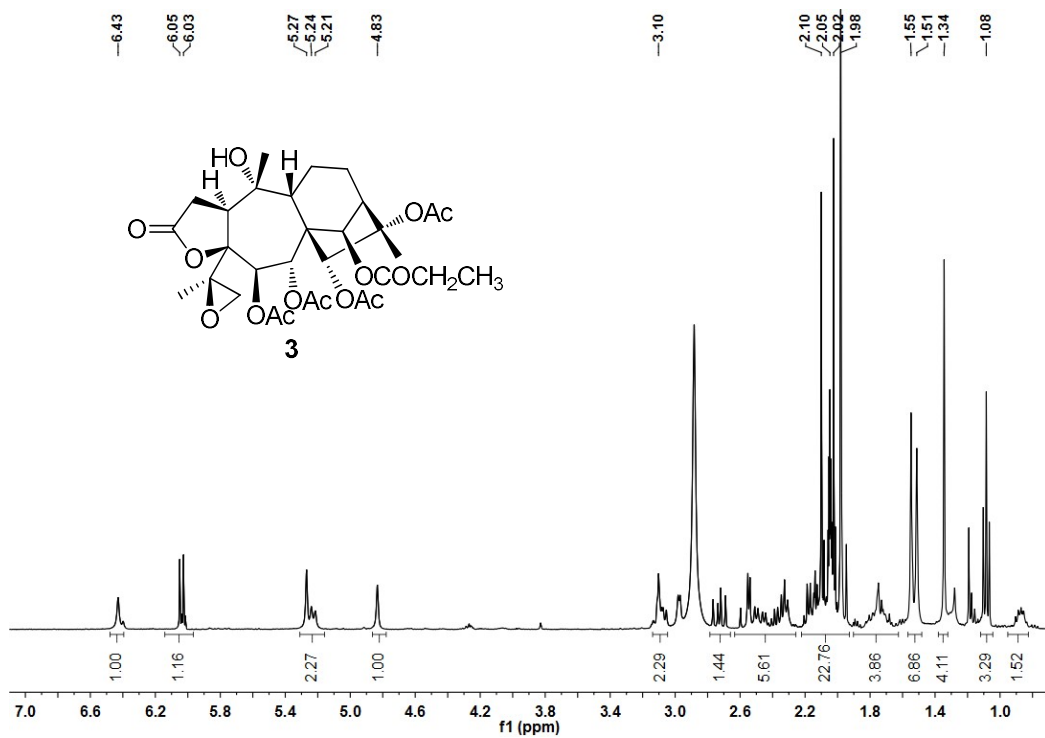

Figure S13. <sup>1</sup>H spectrum of Pierisoid E (3) in acetone-*d*<sub>6</sub>

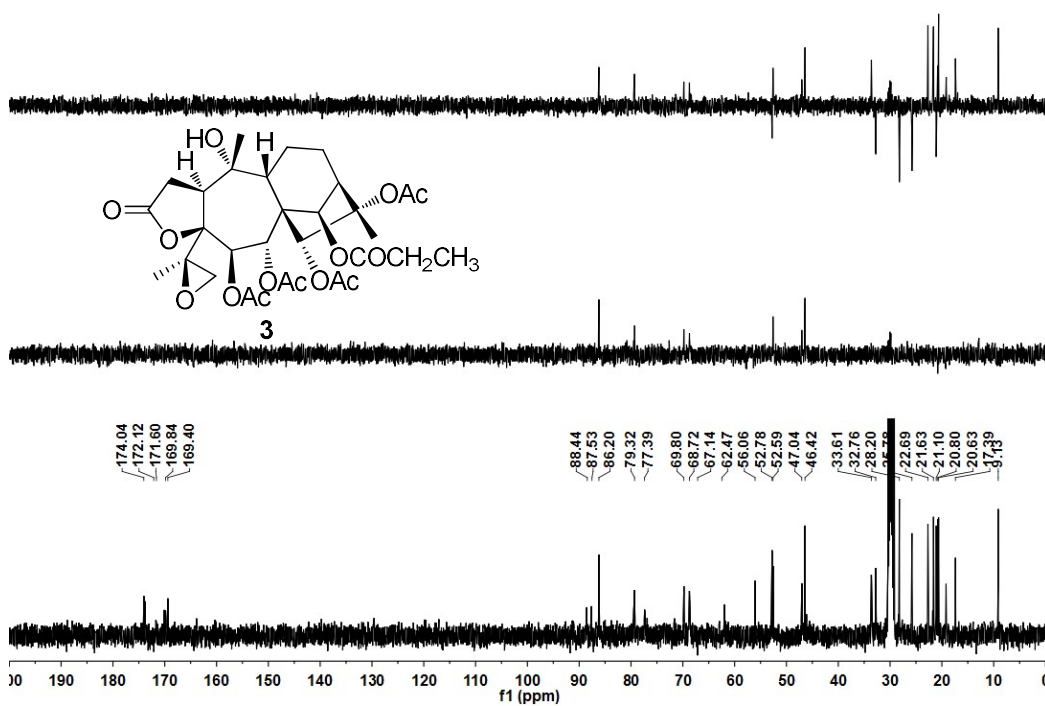

Figure S14. <sup>13</sup>C NMR spectrum of Pierisoid E (3) in acetone-*d*<sub>6</sub>



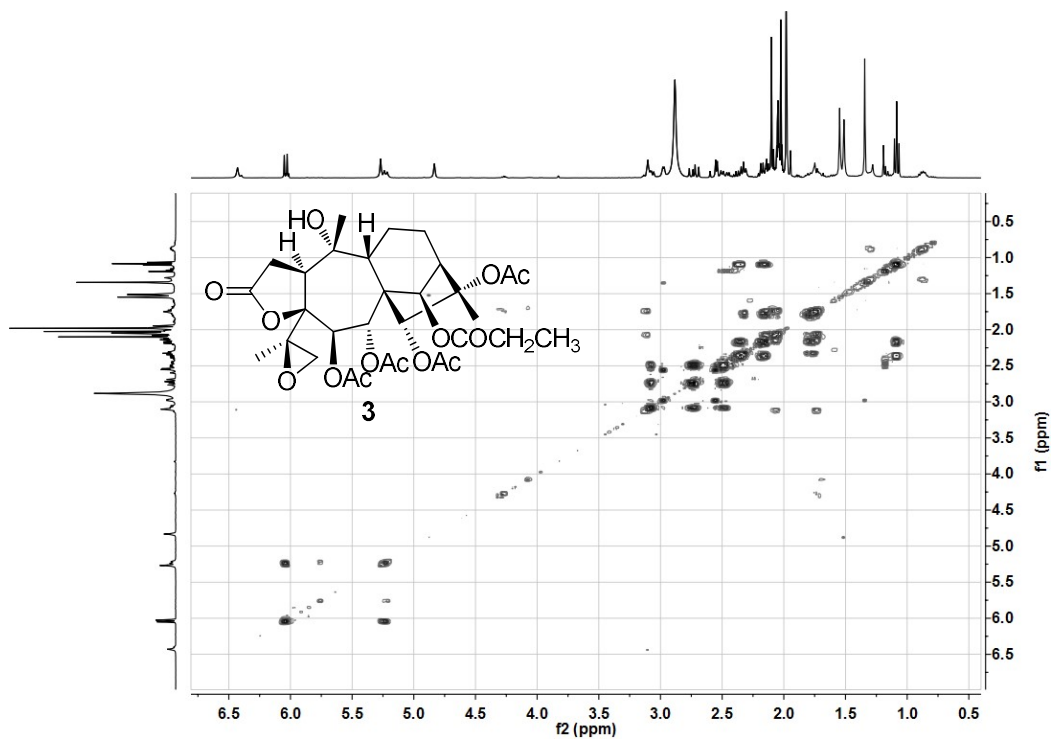

Figure S15.  $^1\text{H}$ - $^1\text{H}$  COSY spectrum of Pierisoid E (**3**) in acetone- $d_6$

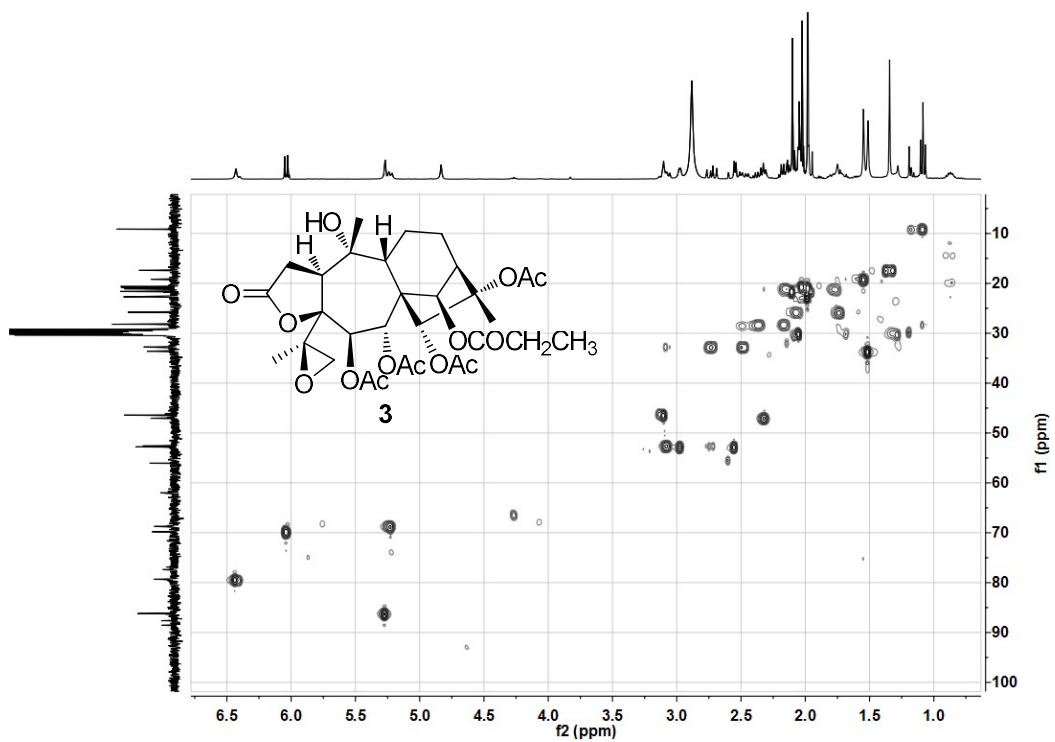

Figure S16. HSQC spectrum of Pierisoid E (**3**) in acetone- $d_6$

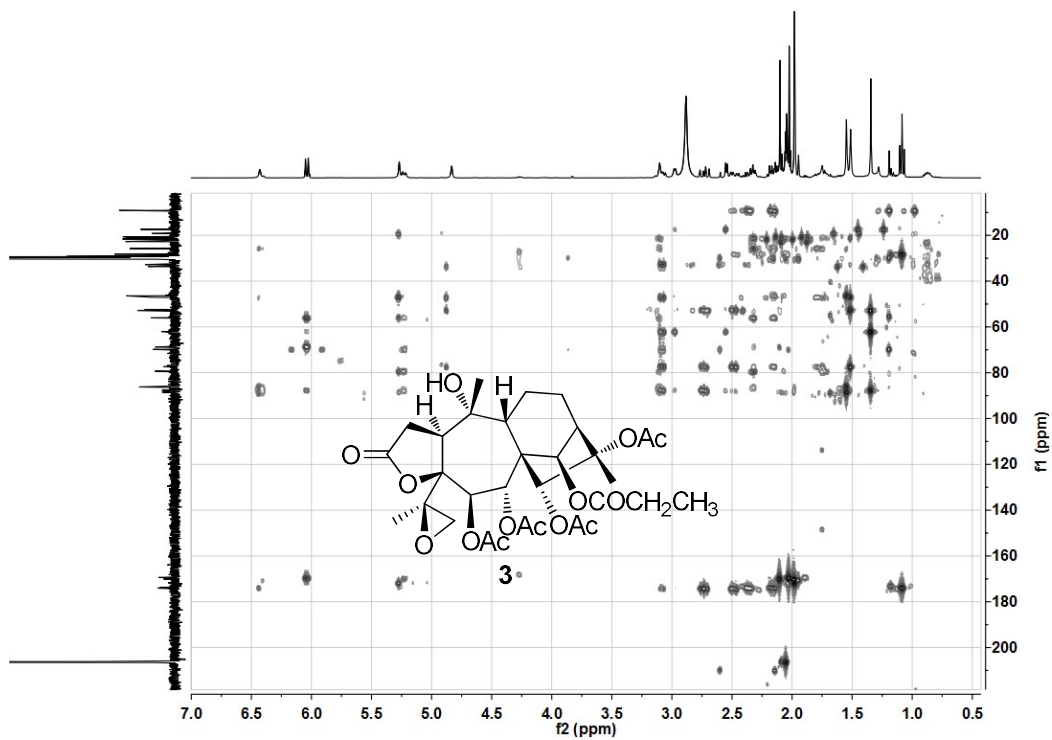

Figure S17. HMBC spectrum of Pierisoid E (3) in acetone- $d_6$

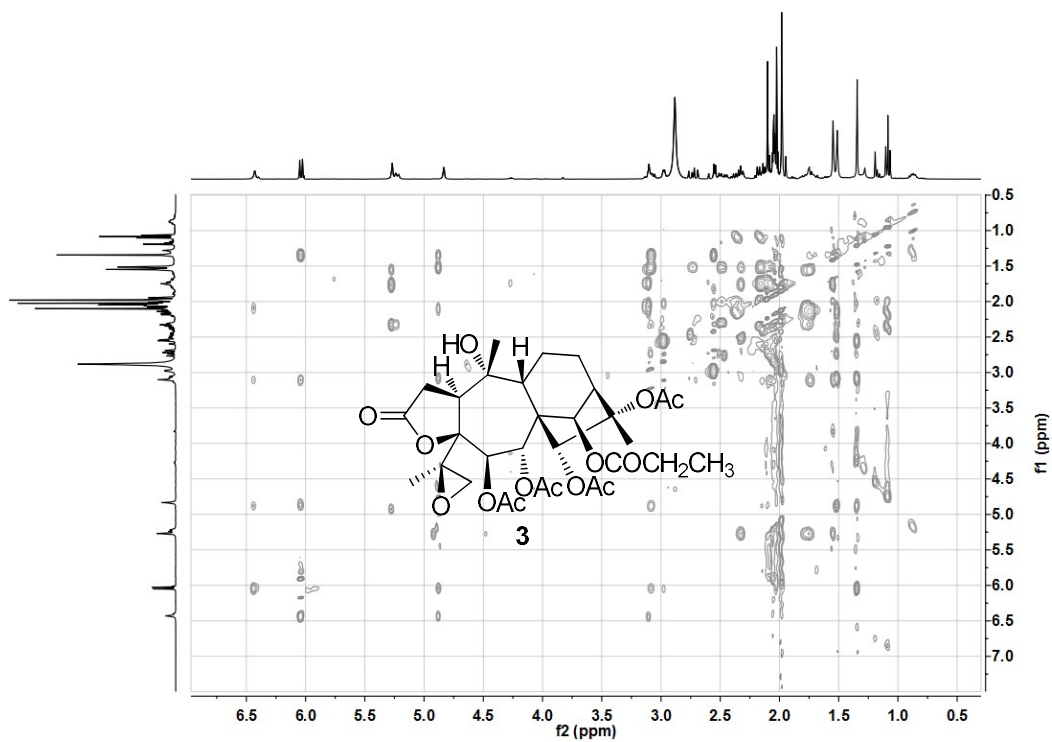

Figure S18. ROESY spectrum of Pierisoid E (3) in acetone- $d_6$
